# Supplementary material for: Insights on the Russian HCV care cascade: minimal HCV treatment for HIV/HCV co-infected PWID in St. Petersburg
Source: PubMed Central journal article supplement (PMC5313079; doi:10.1186/s41124-016-0020-x), 2016-10-11

## Supplemental Figure 1. LINC Enrollment

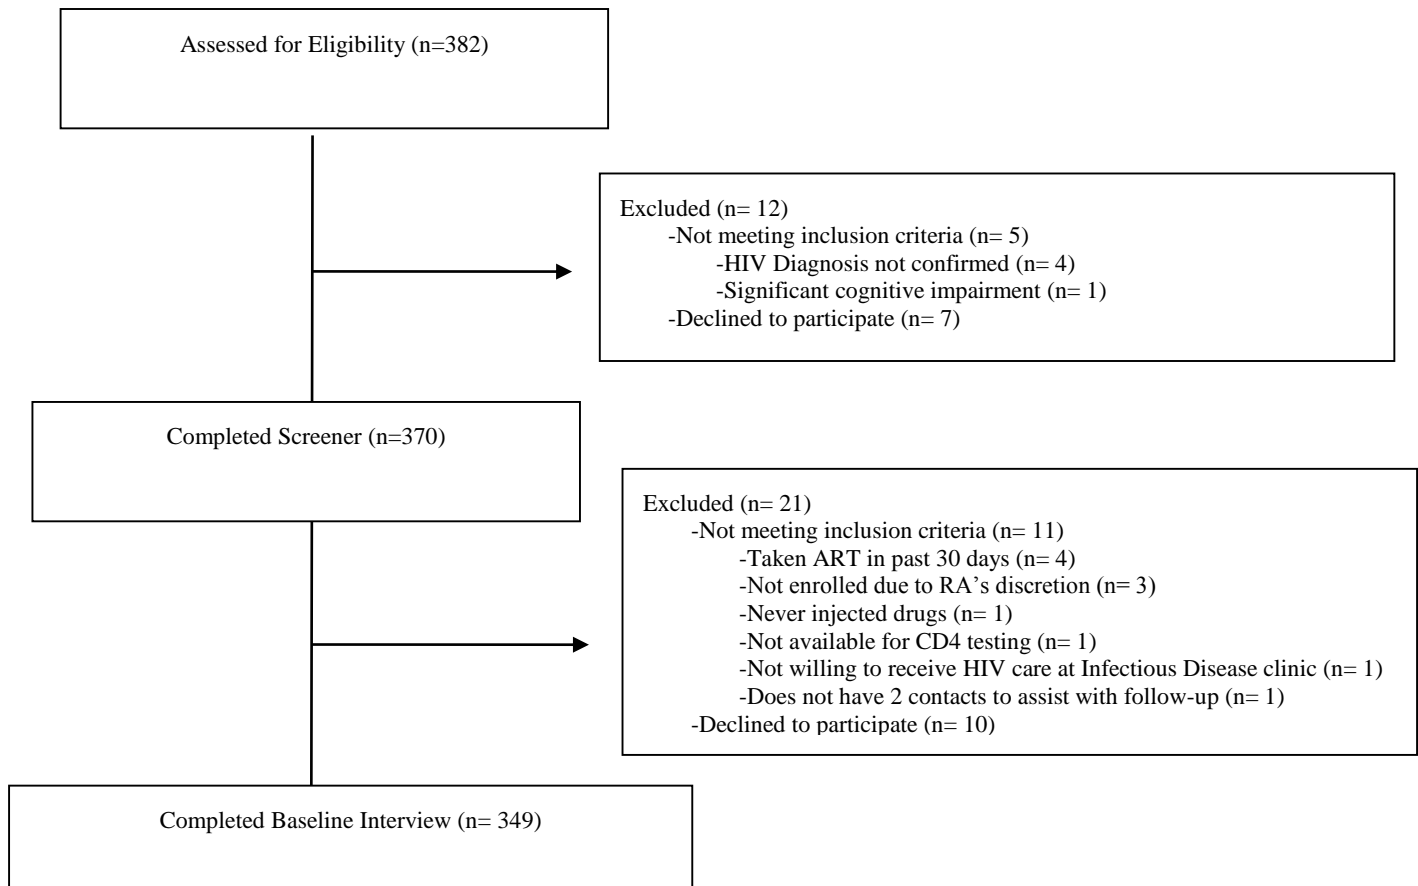

Supplement: NIHMS836659-supplement-S1.pdf [file NIHMS836659-supplement-S1.pdf]
